# Supplementary material for: Erwartungen der Generation Y an digitale Gesundheitsinnovationen
Source: Springer Nature journal article supplement (doi:10.1007/s00103-022-03567-2), 2022-07-29
Supplement: MOESM1 [file 23317774]

Onlinematerial zum Beitrag:

## **Erwartungen der Generation Y an digitale Gesundheitsinnovationen**

Thea Kreyenschulte<sup>1</sup>, Sabine Bohnet-Joschko<sup>1</sup>

<sup>1</sup> Universität Witten/Herdecke, Fakultät für Wirtschaft und Gesellschaft, Lehrstuhl für Management und Innovation im Gesundheitswesen, Witten, Deutschland

### **Korrespondenzadresse**

Thea Kreyenschulte  
Lehrstuhl für Management und Innovation im Gesundheitswesen  
Fakultät für Wirtschaft und Gesellschaft  
Universität Witten/Herdecke  
Alfred-Herrhausen-Straße 50  
58448 Witten  
[thea.kreyenschulte@uni-wh.de](mailto:thea.kreyenschulte@uni-wh.de)

**Onlinematerial:** Interviewleitfaden für die Fokusgruppendifkussionen

| <b>Ablauf, Thema</b>                                                                                                                      | <b>Fragen</b>                                                                                                                                                                                                                                                                     |
|-------------------------------------------------------------------------------------------------------------------------------------------|-----------------------------------------------------------------------------------------------------------------------------------------------------------------------------------------------------------------------------------------------------------------------------------|
| Vorstellung                                                                                                                               | Name, Alter, Schlagwort zum Thema?                                                                                                                                                                                                                                                |
| Relevanz einzelner Lebensbereiche                                                                                                         | Blick auf den Alltag: Was ist bzw. welche Lebensbereiche sind aktuell besonders relevant für euch?<br><br><i>Optionale Anschlussfrage: Was ist vielleicht herausfordernd oder wo wollt ihr wiederum volles Potenzial ausschöpfen?</i>                                             |
| Gesundheitsaspekt                                                                                                                         | Welche Rolle spielt das Thema Gesundheit im Alltag für euch?<br><br><i>Optionale Anschlussfrage: Was für Gesundheitsthemen sind für euch bzw. eure Generation relevant?</i><br><i>Optionale Anschlussfrage: Worauf hat Gesundheit eurer Meinung nach Einfluss in eurem Leben?</i> |
| <b>INPUT I</b><br>Möglichkeiten digitaler Gesundheitsversorgung als Inspiration und Diskussionsgrundlage<br><br>(PowerPoint-Präsentation) | Was davon kennt ihr? Wozu würdet ihr digitale Gesundheitsanwendungen wie diese nutzen?                                                                                                                                                                                            |
| Anschlussfrage                                                                                                                            | Inwiefern glaubt ihr, könnten diese digitalen Anwendungen euch dabei unterstützen, eure aktuellen Ziele und Herausforderungen zu meistern?                                                                                                                                        |
| Spezifikation digitaler Gesundheitsangebote durch Zielgruppe<br>(Breakout-Rooms in Zoom: 3 Minuten)                                       | Ihr benötigt medizinische oder therapeutische Hilfe/ ihr seid erkrankt: welche Art digitaler Gesundheitsangebote nutzt ihr und warum?                                                                                                                                             |
| <b>INPUT II</b><br>Kurzer Input zu potenziellen Zukunftsszenarien<br><br>(PowerPoint-Präsentation)                                        | Ihr schaut in das Jahr 2035: Was wäre ein Anwendungsszenario, in dem ihr Gebrauch von digitalen Angeboten machen würdet?                                                                                                                                                          |
| Präferenzen und Einflussfaktoren                                                                                                          | Was wäre euch zusammenfassend allgemein wichtig bei digitalen Angeboten (Produkten, Prozessen, Services)?<br><br><i>Optionale Anschlussfrage: Wer könnte euch solche anbieten?</i>                                                                                                |
